# Supplementary material for: Novel dynamics of human mucociliary differentiation revealed by single-cell RNA sequencing of nasal epithelial cultures
Source: Oxford University Press journal article supplement (doi:10.1242/dev.177428), 2019-09-26
Supplement: dev177428supp.pdf [file dev177428supp.pdf]

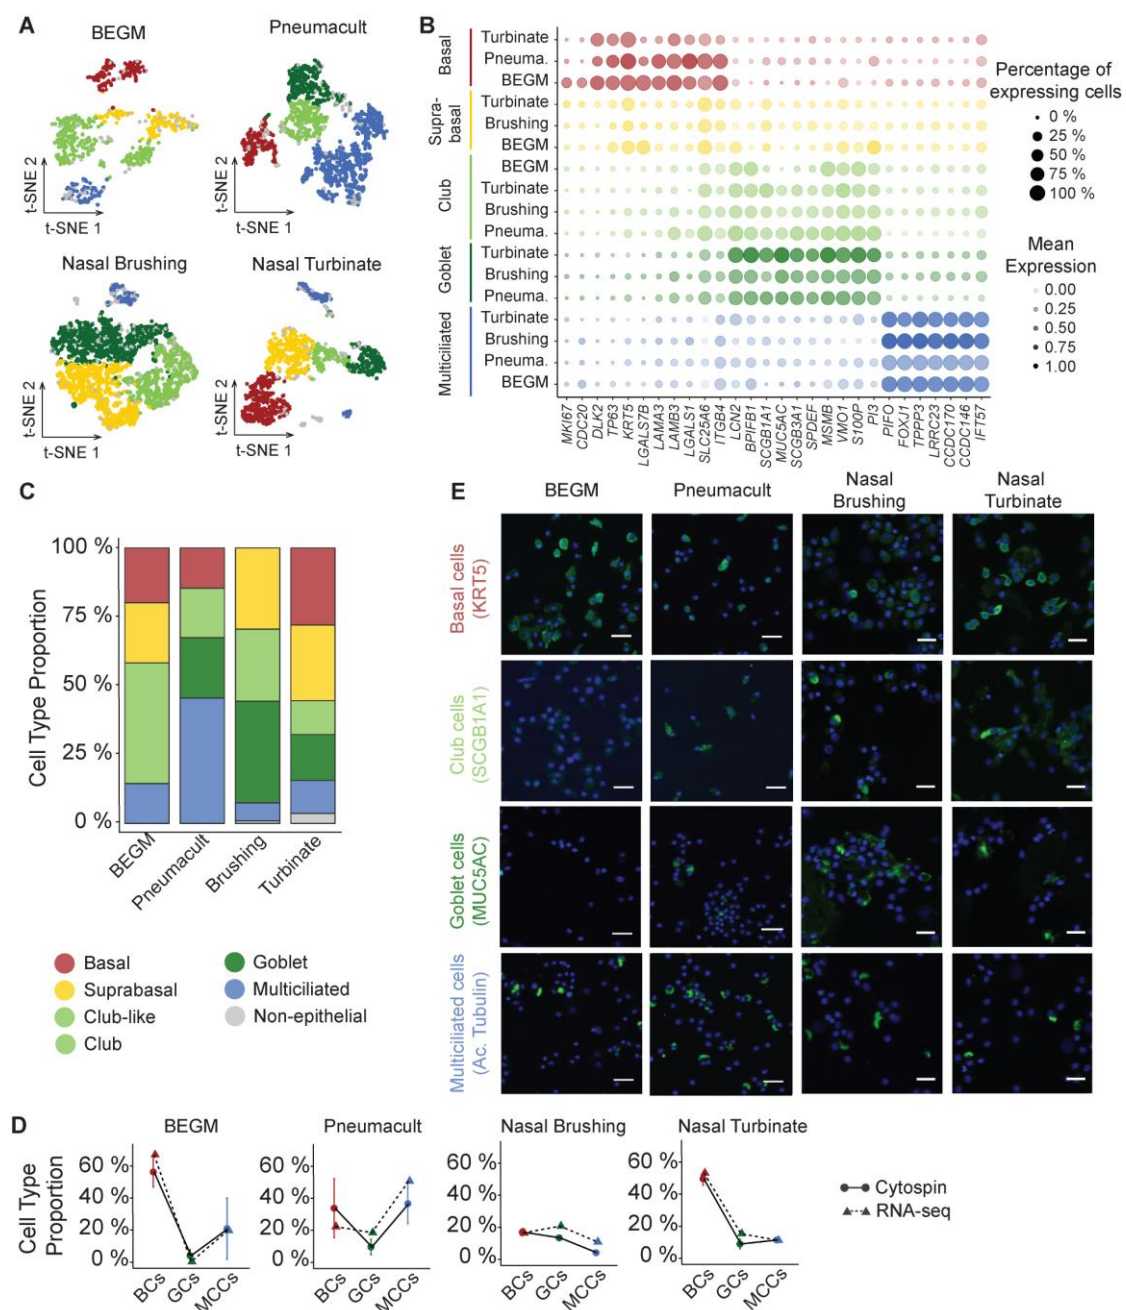

**Fig. S1. Cell type composition comparison between homeostatic *in vitro* samples and fresh human tissues**

(A) t-SNE representing the distinct cell populations identified in each sample. (B) Dot plot of the main cell population marker genes. Dot size describe the percentage of cells expressing the respective marker genes and the average expression level of that gene based on UMI counts are shown by color intensity. (C) Relative abundance of cell types in each sample. (D) Scatter plot of the percentage of cells expressing the selected marker genes for basal, goblet and multiciliated cells at the transcript (dotted line) and protein level (full line). (E) Immunostaining of the selected marker genes for basal, secretory, goblet and multiciliated in cytospin for each sample. Scale bar: 50  $\mu$ m.

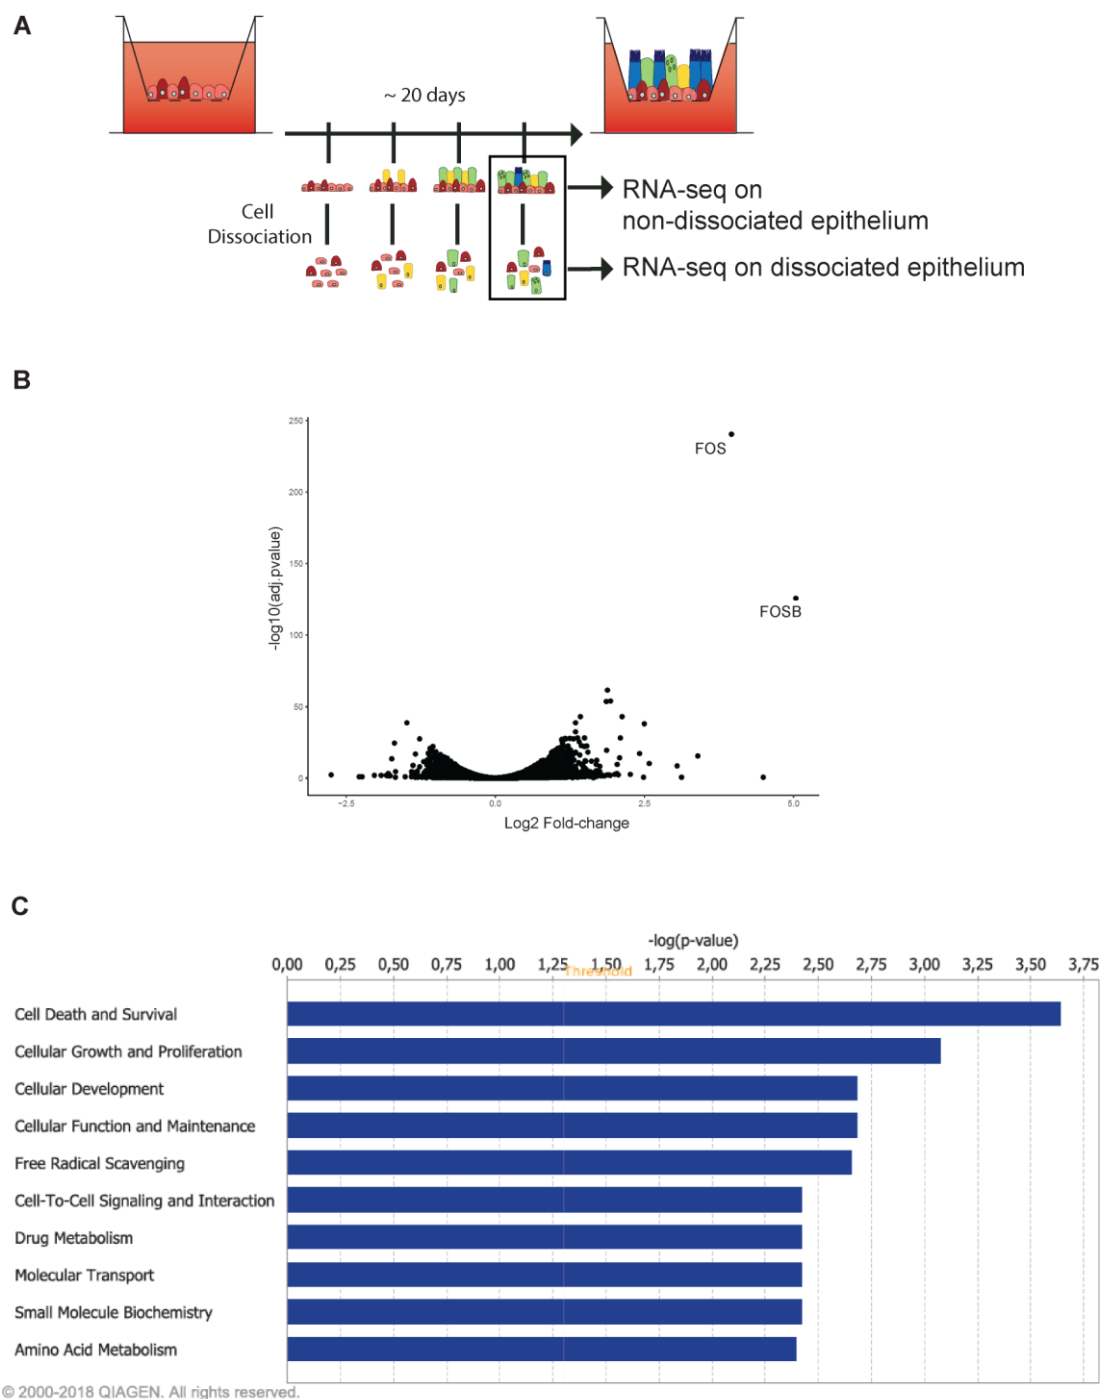

**Fig. S2. Effect of cell dissociation on HAEC gene expression**

(A) RNA-seq experimental design. Regenerating airway epithelia was dissociated at 28 days after a transition to an air-liquid interface. Dissociated and non-dissociated cultures from 2 donors were subjected to RNA-seq. (B) Volcano plot showing differential gene expression of dissociated vs. non-dissociated cell cultures. (C) Identification, with Ingenuity Pathway Analysis (Qiagen) of the molecular functions most significantly affected by dissociation, based on an analysis of 300 differentially expressed genes ( $\text{FDR} < 0.01$  and  $\text{abs}(\log_2\text{FC}) > 1$ ).

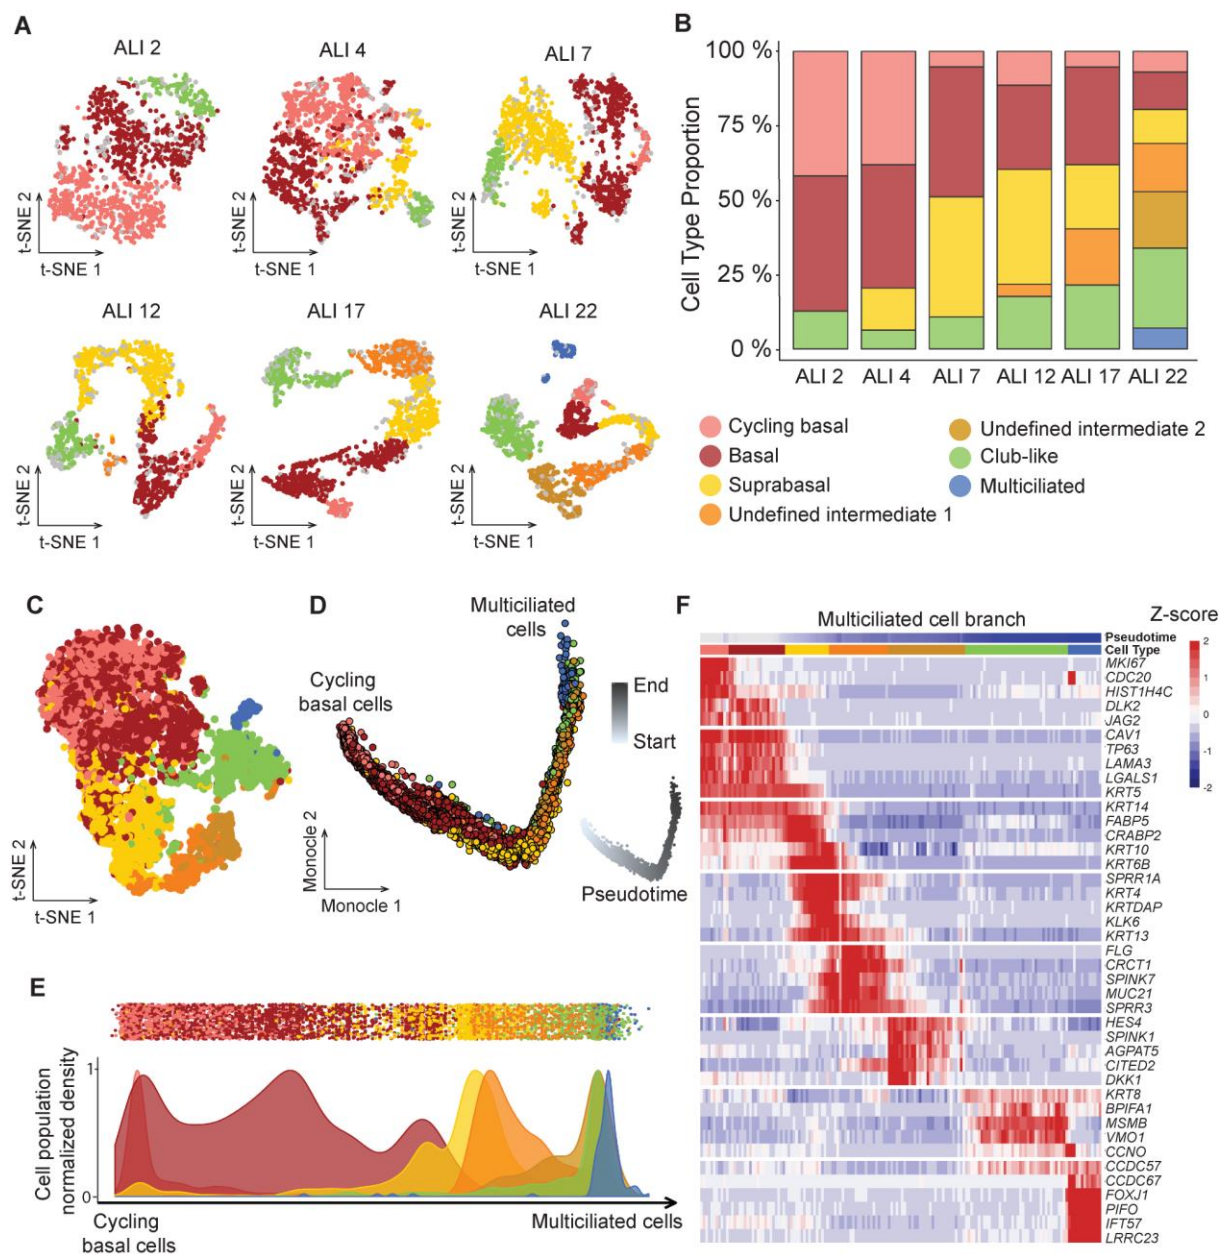

**Fig. S3. Characterization of MCC cell lineages during airway epithelium regeneration using single cell RNA-Seq in BEGM medium**

(A) t-SNE representing the distinct cell populations identified at each time points. (B) Relative abundance of cell types at each time point. (C) t-SNE plot of the aggregate of all cells from each time point. (D) Representation of the cell lineages inferred by Monocle 2 occurring during the upper airway epithelium regeneration (aggregate of all time points). Pseudotime evolution along the differentiation trajectory shown by white to grey gradient. (E) Distribution of the defined cell types in pseudotime. (F) Heatmap representing the smoothed temporal expression pattern of indicated cell type specific marker genes on MCC trajectory. Cells were ordered by cluster appearance in pseudotime.



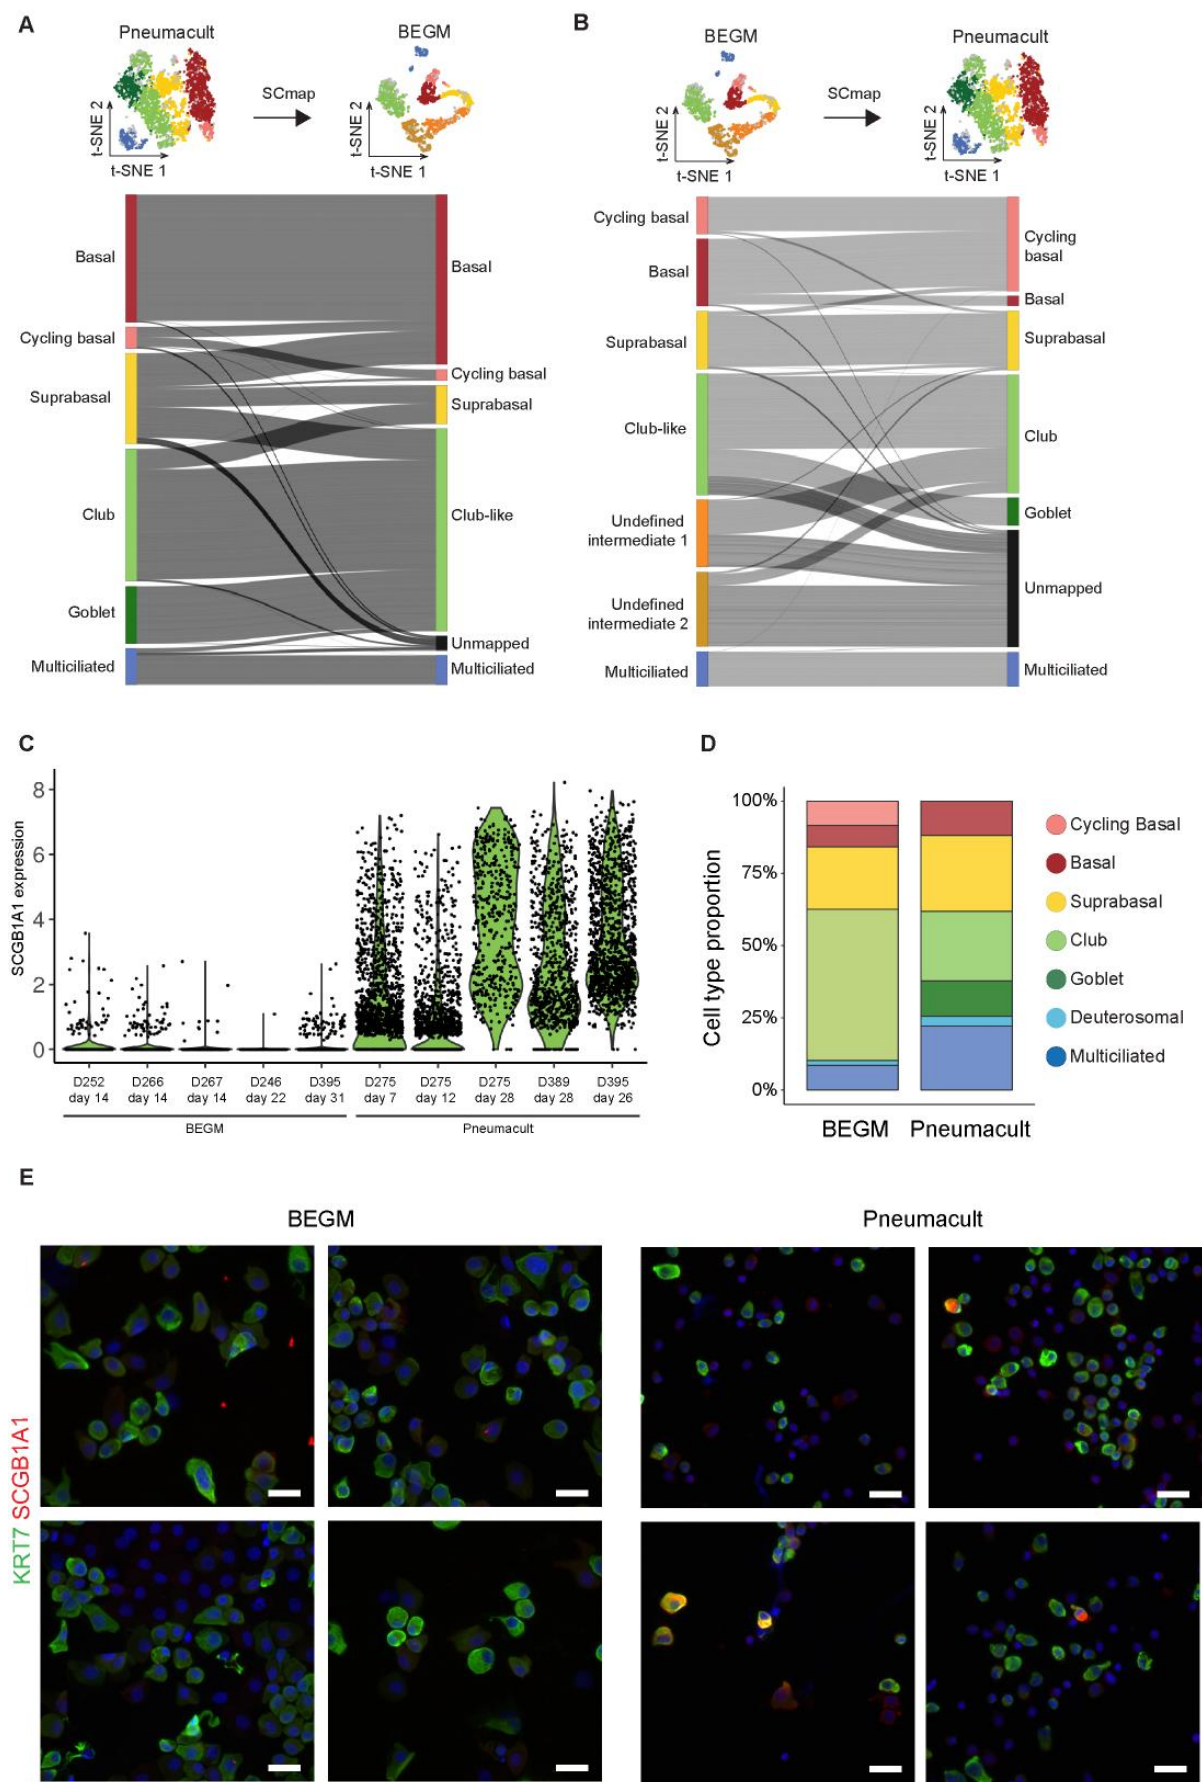

**Fig. S4. Comparison of fully differentiated epithelia cell population between Pneumacult and BEGM media**

(A) Sankey Network of the mapping of Pneumacult cells onto BEGM cells. (B) Sankey Network of the mapping of BEGM cells onto Pneumacult cells. (C) *SCGB1A1* expression in single-cell analysis of ALI cultures arising from 5 donors, either differentiated in BEGM medium, or in Pneumacult medium. (D) Cell proportions identified from single-cell RNAseq analysis in cells from the same donor differentiated in BEGM (Day 31) and Pneumacult (Day 26) media. (E) Immunostaining for *SCGB1A1* of cells from the same donor differentiated in BEGM (Day 31) and Pneumacult (Day 26). ALI cultures were dissociated and cytopinned for better visualization. KRT7 was also stained as marker of apical/luminal cells.

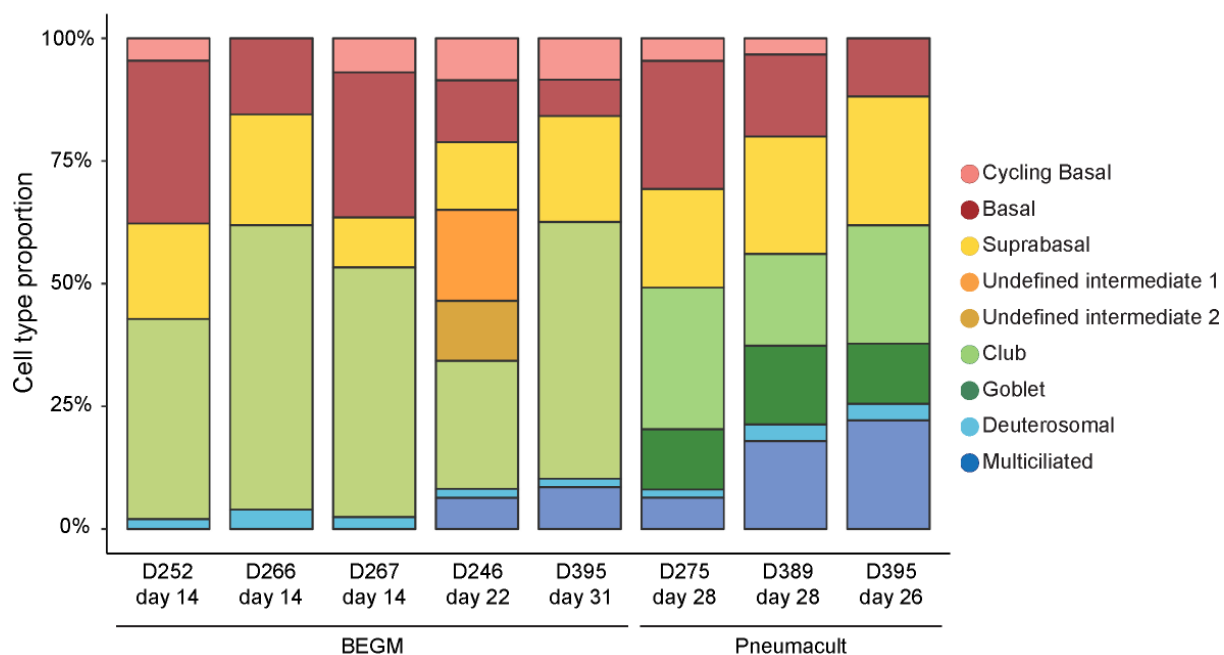

**Fig. S5:** Cell population distribution from single-cell RNAseq analysis of 8 ALI cultures from 7 independent donors, in BEGM or Pneumacult medium, at several time points. Undefined intermediates have only been identified in one ALI culture.

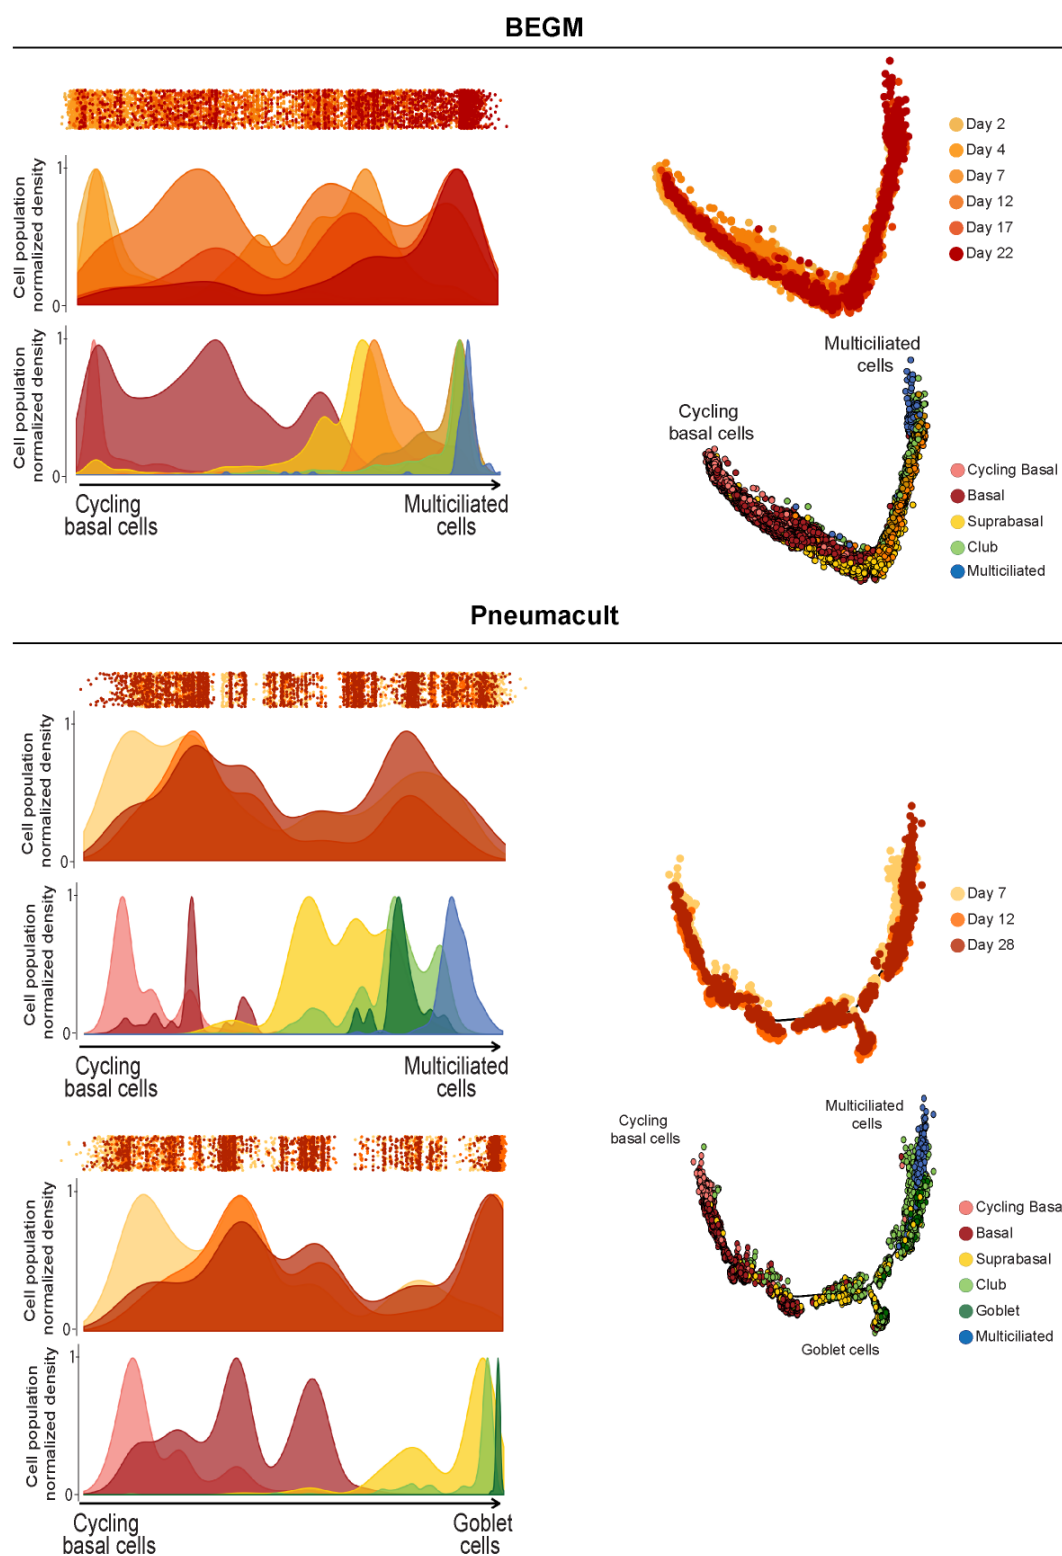

**Fig. S6.** Trajectory and pseudotime reconstructions color coded by isolation time-point in BEGM and Pneumacult media (aggregate of all time points).

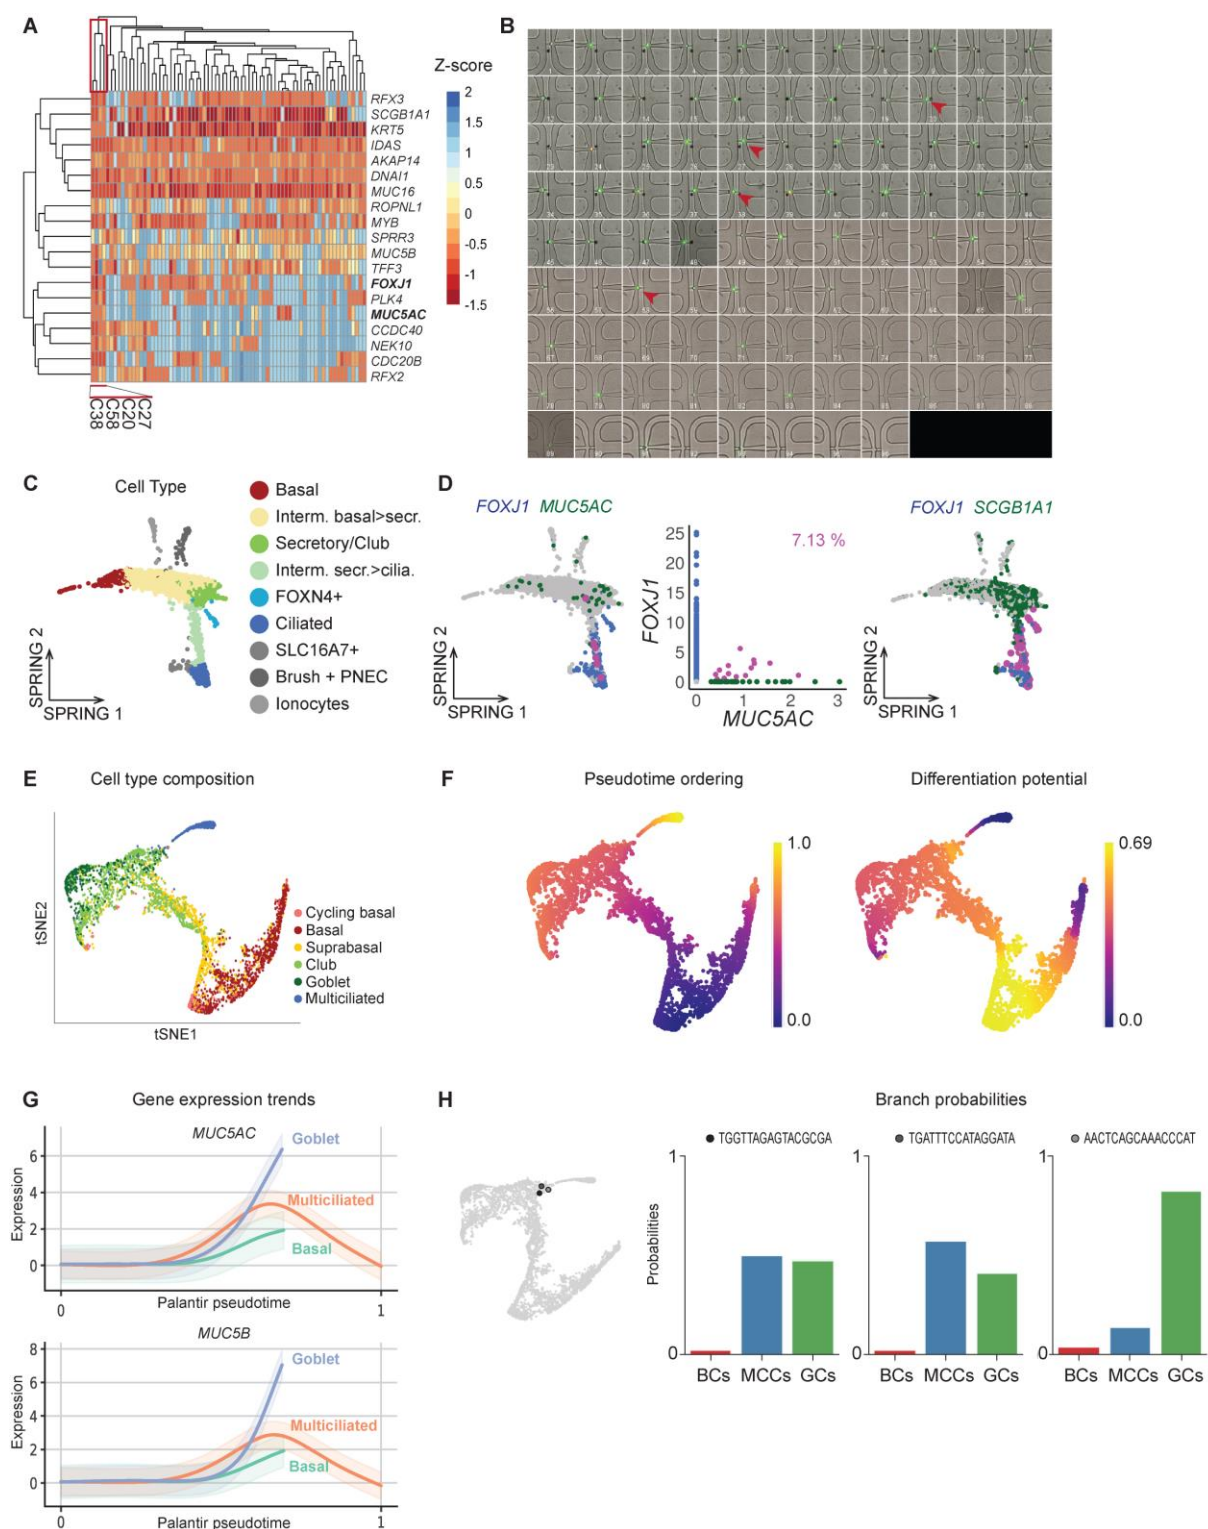

**Fig. S7. Validation of Goblet cells markers in multiciliated cells in doublet free single cell transcriptomic datasets**

(A) Heatmap colored by Z-score from C1 Biomark experiment in PneumaCult media, co-expression of Goblet and Multiciliated cell markers in single cells (red cluster). (B) C1™ Single-Cell Preamp IFC (10–17 μm) imaging, Red arrowheads show cells expressing both cell type markers (*FOXJ1* and *MUC5AC*),



one cell per chamber, green cells=living cells, red cells=dead cells. (C) SPRING representations of Plasschaert *et al.* dataset colored by cell type. (D) SPRING representations of Plasschaert *et al.* dataset colored. Left panel colored by *FOXJ1*+ cells (blue), *MUC5AC*+ cells (green), co-expressing *FOXJ1* and *MUC5AC* cells (pink). Center panel displays a scatter plot of normalized expression of *MUC5AC* and *FOXJ1* in cells (dot) colored by *FOXJ1*+ cells (blue), *MUC5AC*+ cells (green), co-expressing *FOXJ1* and *MUC5AC* cells (pink). Right panel colored by *FOXJ1*+ cells (blue), *SCGB1A1*+ cells (green), co-expressing *FOXJ1* and *SCGB1A1* cells (pink). (E) t-SNE representation of the Pneumacult ALI 28 dataset after analysis by Palantir, colored by cell type. (F) t-SNE representation of the Pneumacult ALI 28 dataset after analysis by Palantir, colored by pseudotime (left panel) or differentiation potential (right panel). (G) Gene expression trends for *MUC5AC* and *MUC5B* for basal, goblet, and multiciliated cells, computed by Palantir. (H) Branch probabilities for 3 selected goblet cells. Left panel : t-SNE representation of the Pneumacult ALI 28 dataset after analysis by Palantir, showing the 3 selected goblet cells. Right panel: branch probabilities for the 3 selected cells.

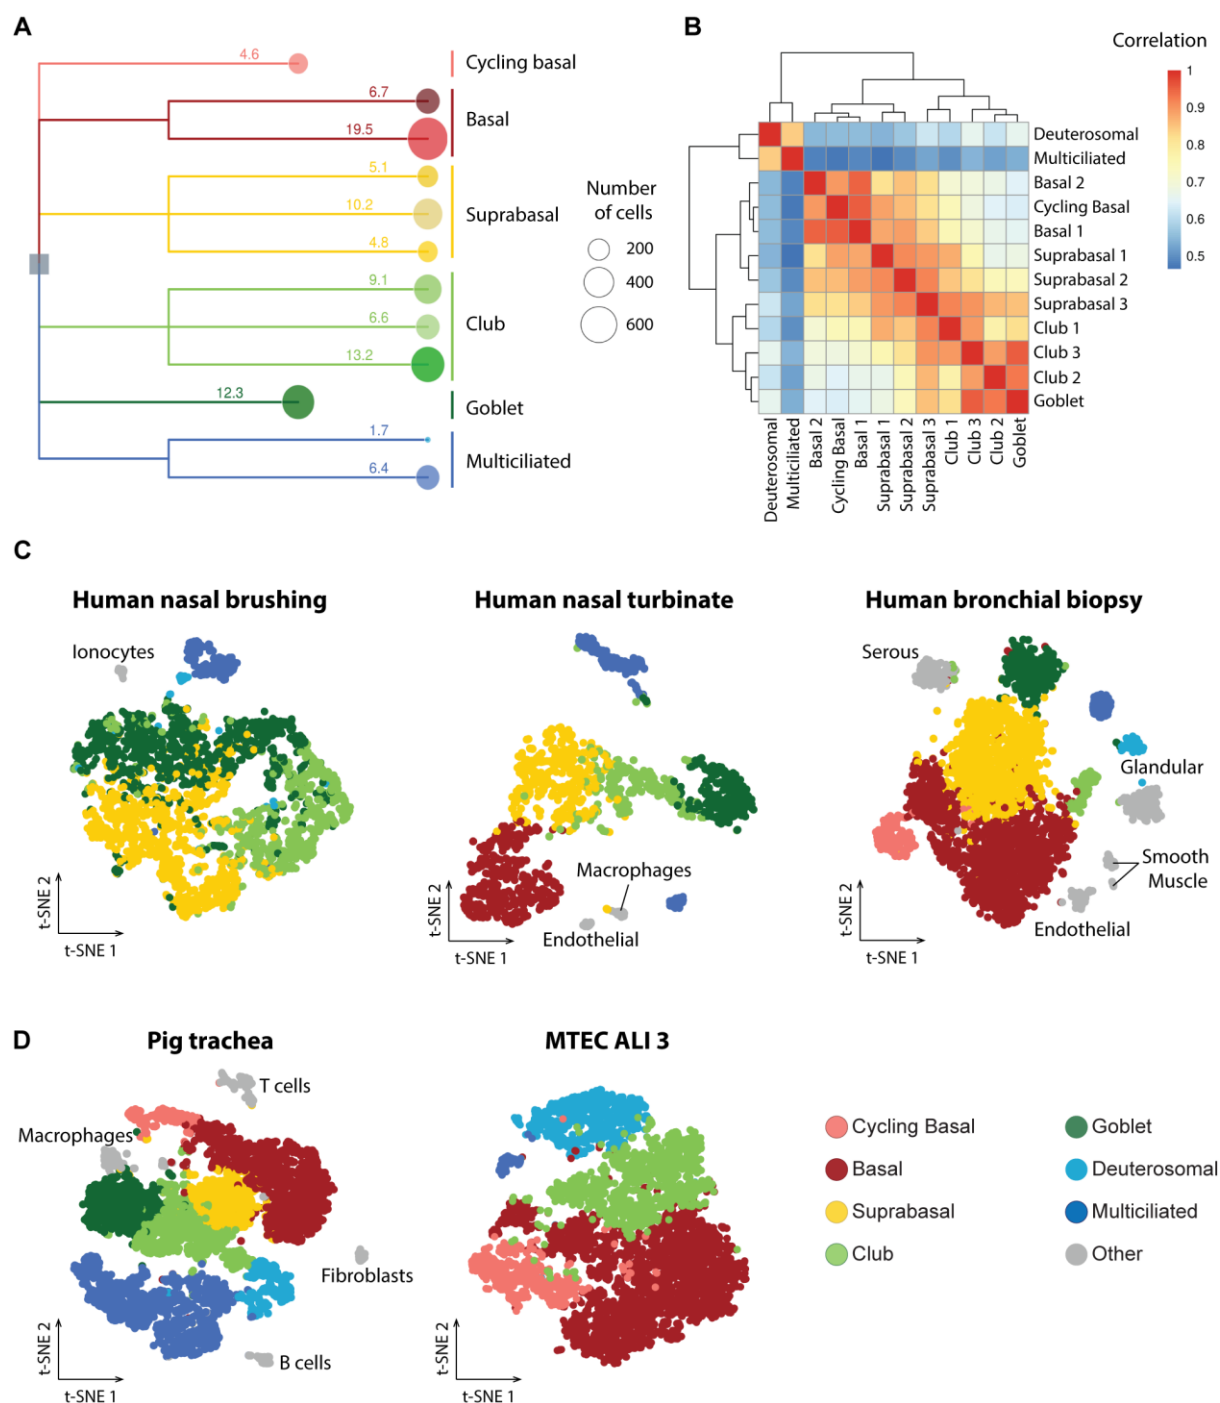

**Fig. S8. Identification of subpopulations by high resolution cell clustering**

(A) Dendrogram of cell types identified through robust and high-resolution clustering of scRNA-seq data from Pneumacult ALI 28 sample. Numbers indicate percentage of each cluster. (B) Correlation matrix of cell type identified in Pneumacult sample. (C) t-SNE representation of scRNA-seq data from human nasal brushing (left), nasal turbinate (center), bronchial biopsy (right). (D) t-SNE representation of scRNA-seq data from pig trachea (left) and mouse culture (right).

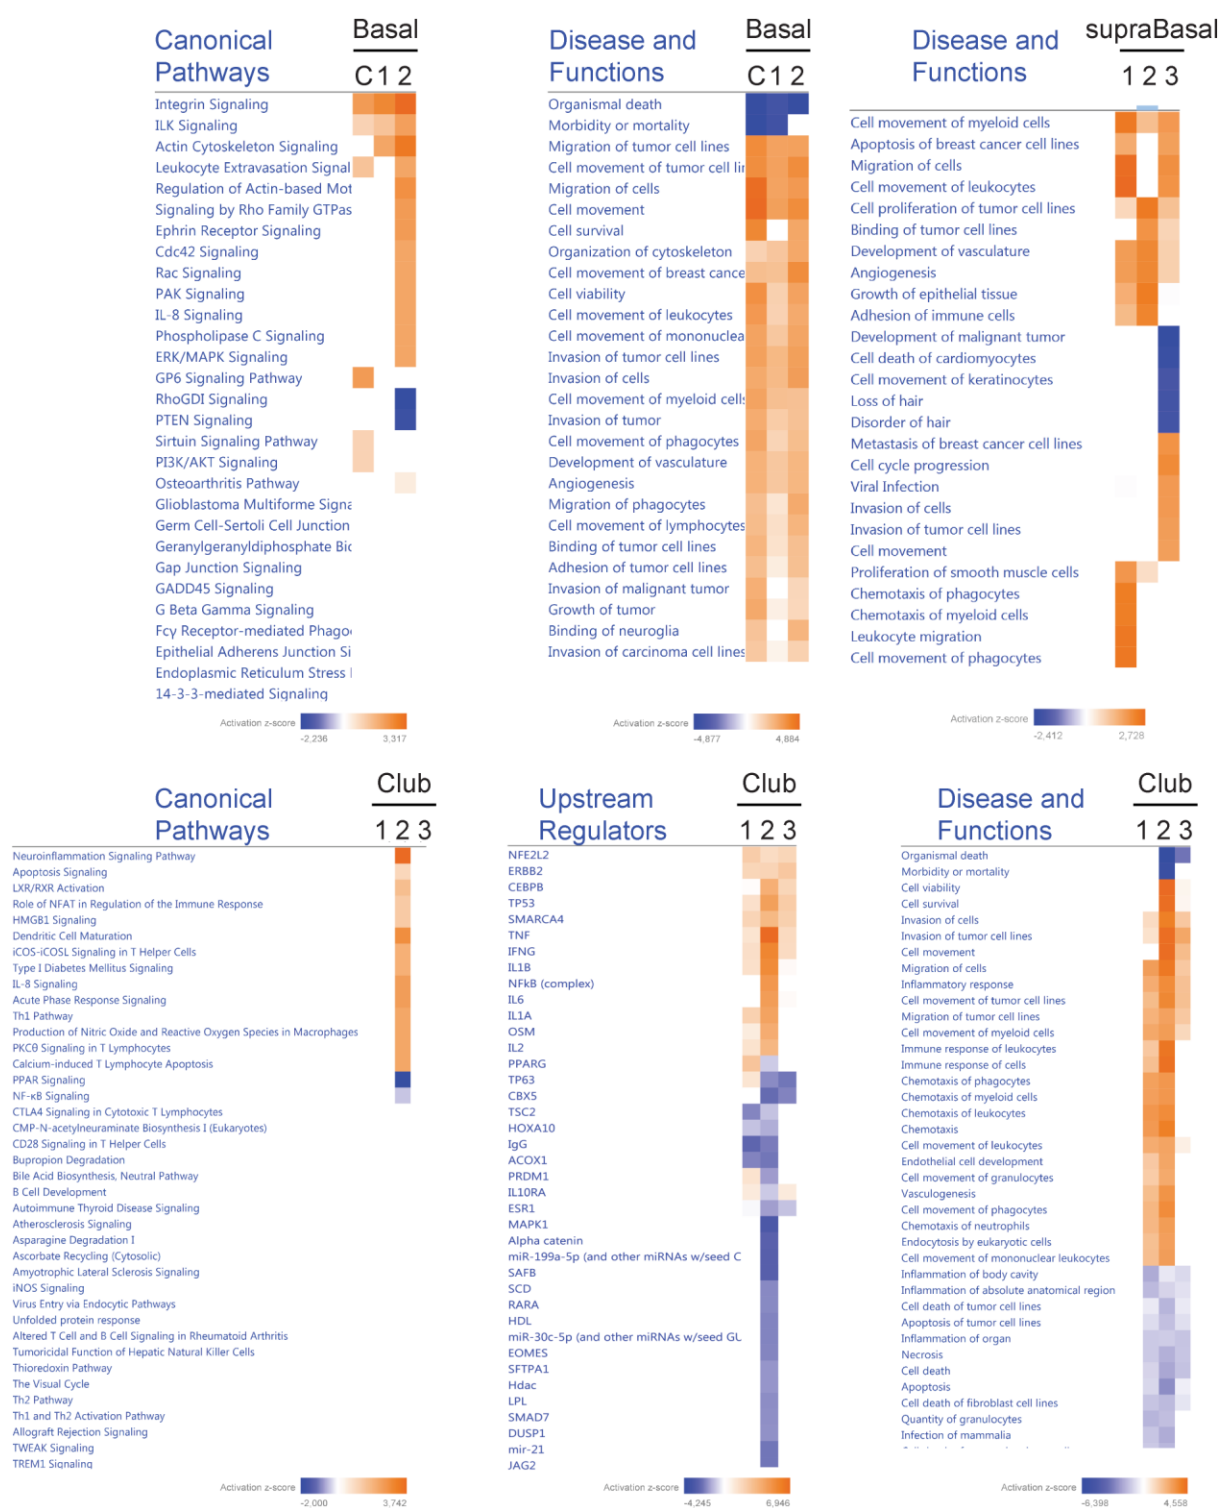

**Fig. S9. Pathway enrichment comparison between basal, suprabasal and secretory cell subtypes**

Identification, with Ingenuity Pathway Analysis (Qiagen) of the enriched canonical pathways, upstream regulators and disease and functions in each of the basal and secretory subpopulations, based on an analysis of 300 differential expressed genes (FDR<0.01 and log2FC>0.6 for BCs and SCs, and log2FC>0.4 for supraBCs). C: cycling basal cells.

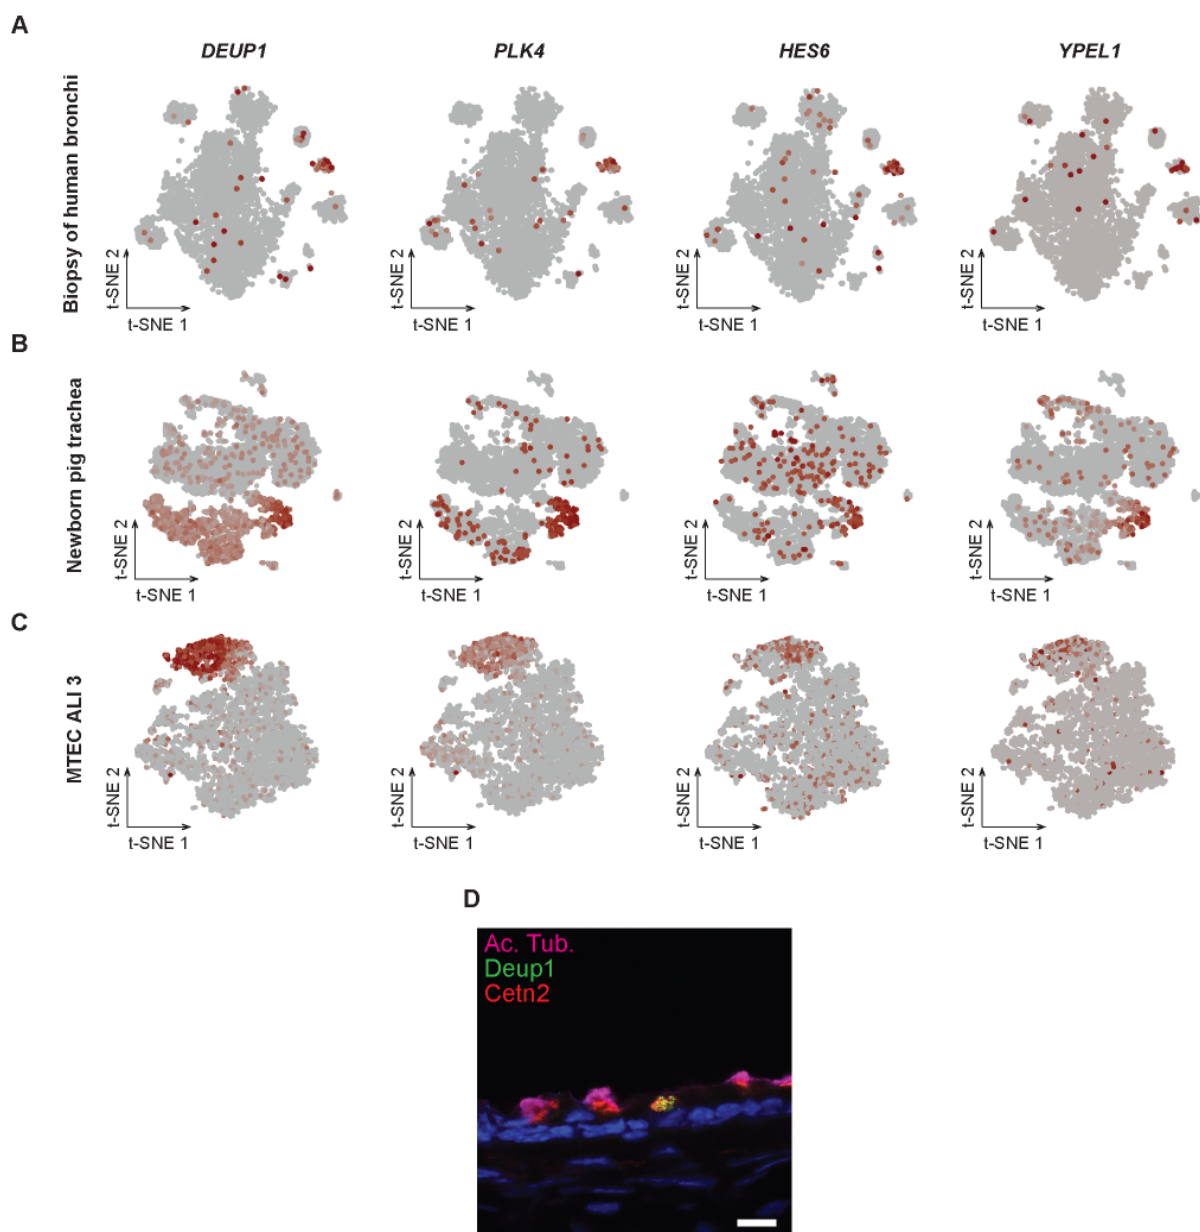

**Fig. S10. Robustness of Deuterosomal cells marker genes**

(A-C) t-SNE representation of Deuterosomal cell population marker genes expression (lowly to highly expressed, grey to red) in (A) Biopsy of human trachea, (B) Newborn pig trachea, (C) MTECs ALI 3. (D) Immunohistochemistry on a section of adult mouse trachea showing acetylated tubulin, Deup1 and Centrin 2 expression. Scale bar : 10  $\mu$ m.

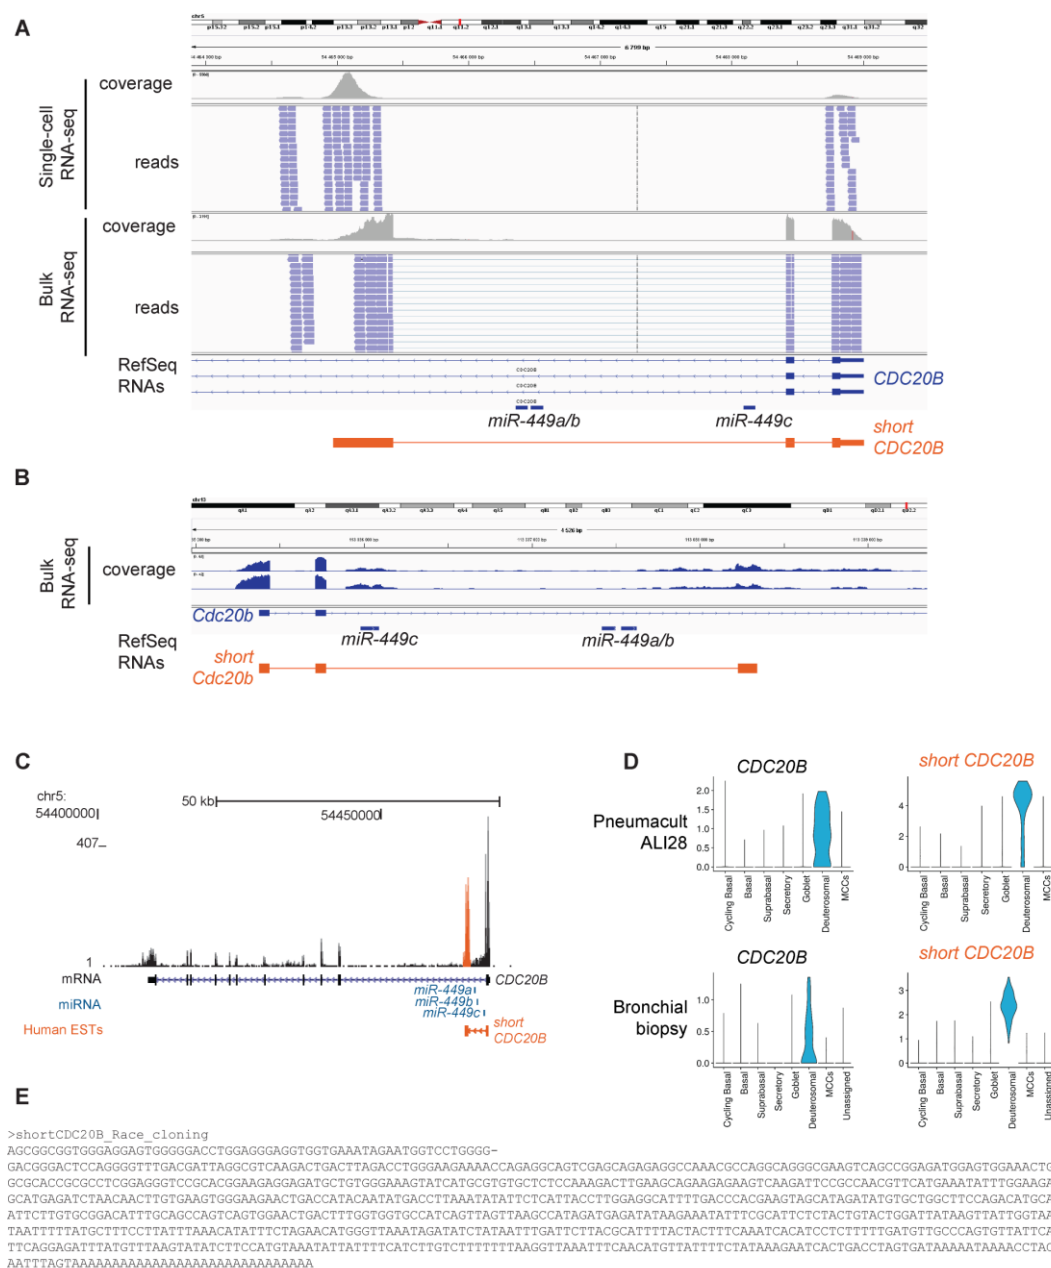

**Fig. S11. Identification of short CDC20B, a novel isoform of a deuterosomal cell population marker gene.**

(A) Integrated Genome Viewer (hg19) view of the *CDC20B* gene with coverage and read alignment from bulk RNA-seq of well-differentiated HAECs and single-cell RNA-seq of ALI 14 differentiated HAECs from the dataset GSE103518. (B) Genome Viewer (mm10) view of the *Cdc20b* gene with coverage from bulk RNA-seq of ALI 7 differentiated MTECs from the dataset GSE75715. (C) UCSC Genome browser (hg19) view of the *CDC20B* gene with coverage from read alignment from bulk RNA-seq of ALI28 differentiated HAECs. The alternative 3rd exon is shown in orange. (D) Violin plots for *CDC20B* and short *CDC20B* abundance in the Pneumacult ALI28 and the bronchial biopsies samples. (E) Alternative human short *CDC20B* sequence identified with 5' race cloning.



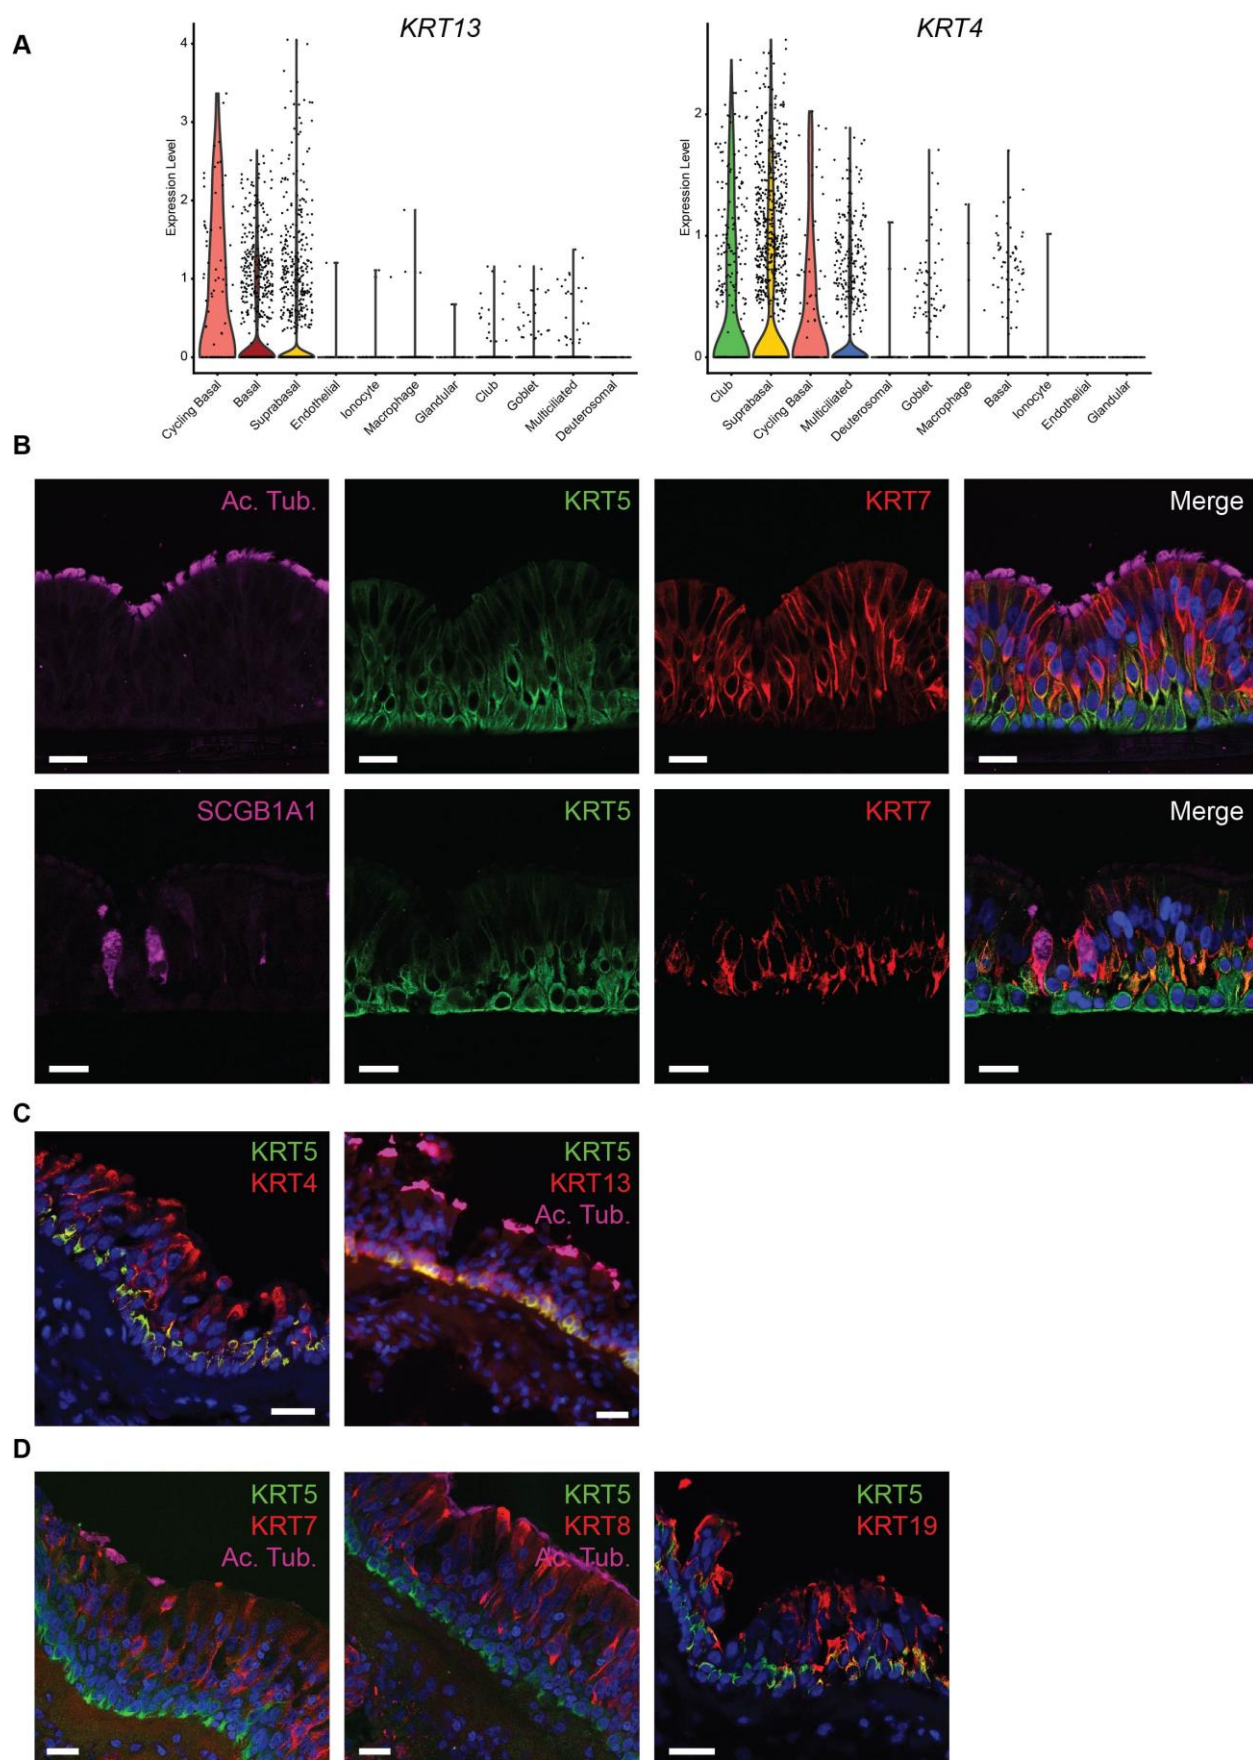

**Fig. S12. Keratin expression in nasal airway epithelium**

(A) Violin plots for KRT13 and KRT4 expression in epithelial cells freshly isolated from a nasal turbinate. (B) Immunohistochemistry for KRT5, KRT7 and Acetylated Tubulin or SCGB1A1 on sections of Pneumacult-fully differentiated *in vitro* epithelium, as in Fig. 4F, with split channels. (C) Immunohistochemistry for KRT5, KRT4 and KRT13 in sections of nasal turbinates. (D) Immunohistochemistry for KRT5, KRT7, KRT8 and KRT19 in sections of nasal turbinates. Cilia are labeled with acetylated tubulin when noted. Scale bars: 20  $\mu$ m.

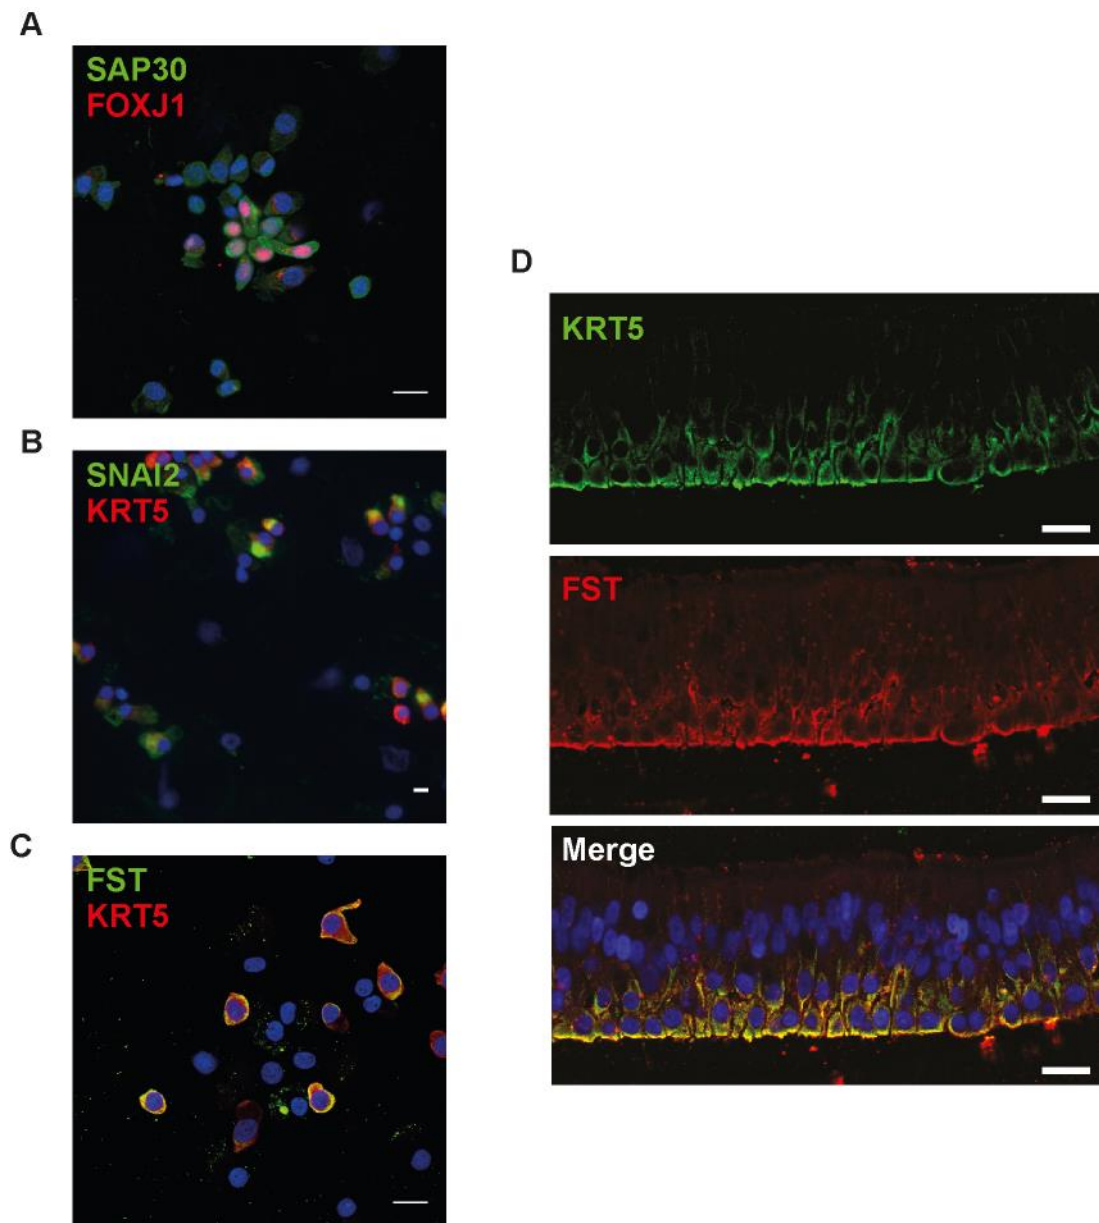

**Fig. S13. Validation of expression of signaling pathways components**

(A) Immunocytochemistry for SAP30 and FOXJ1 on dissociated Pneumacult-fully differentiated cells. (B) Immunocytochemistry for SNAI2 and KRT5 on dissociated epithelial cells from a nasal brushing. (C) Immunocytochemistry for FST and KRT5 on dissociated Pneumacult-fully differentiated cells. (D) Immunocytochemistry for FST and KRT5 on sections of Pneumacult-fully differentiated cells. Scale bars: 20  $\mu$ m.

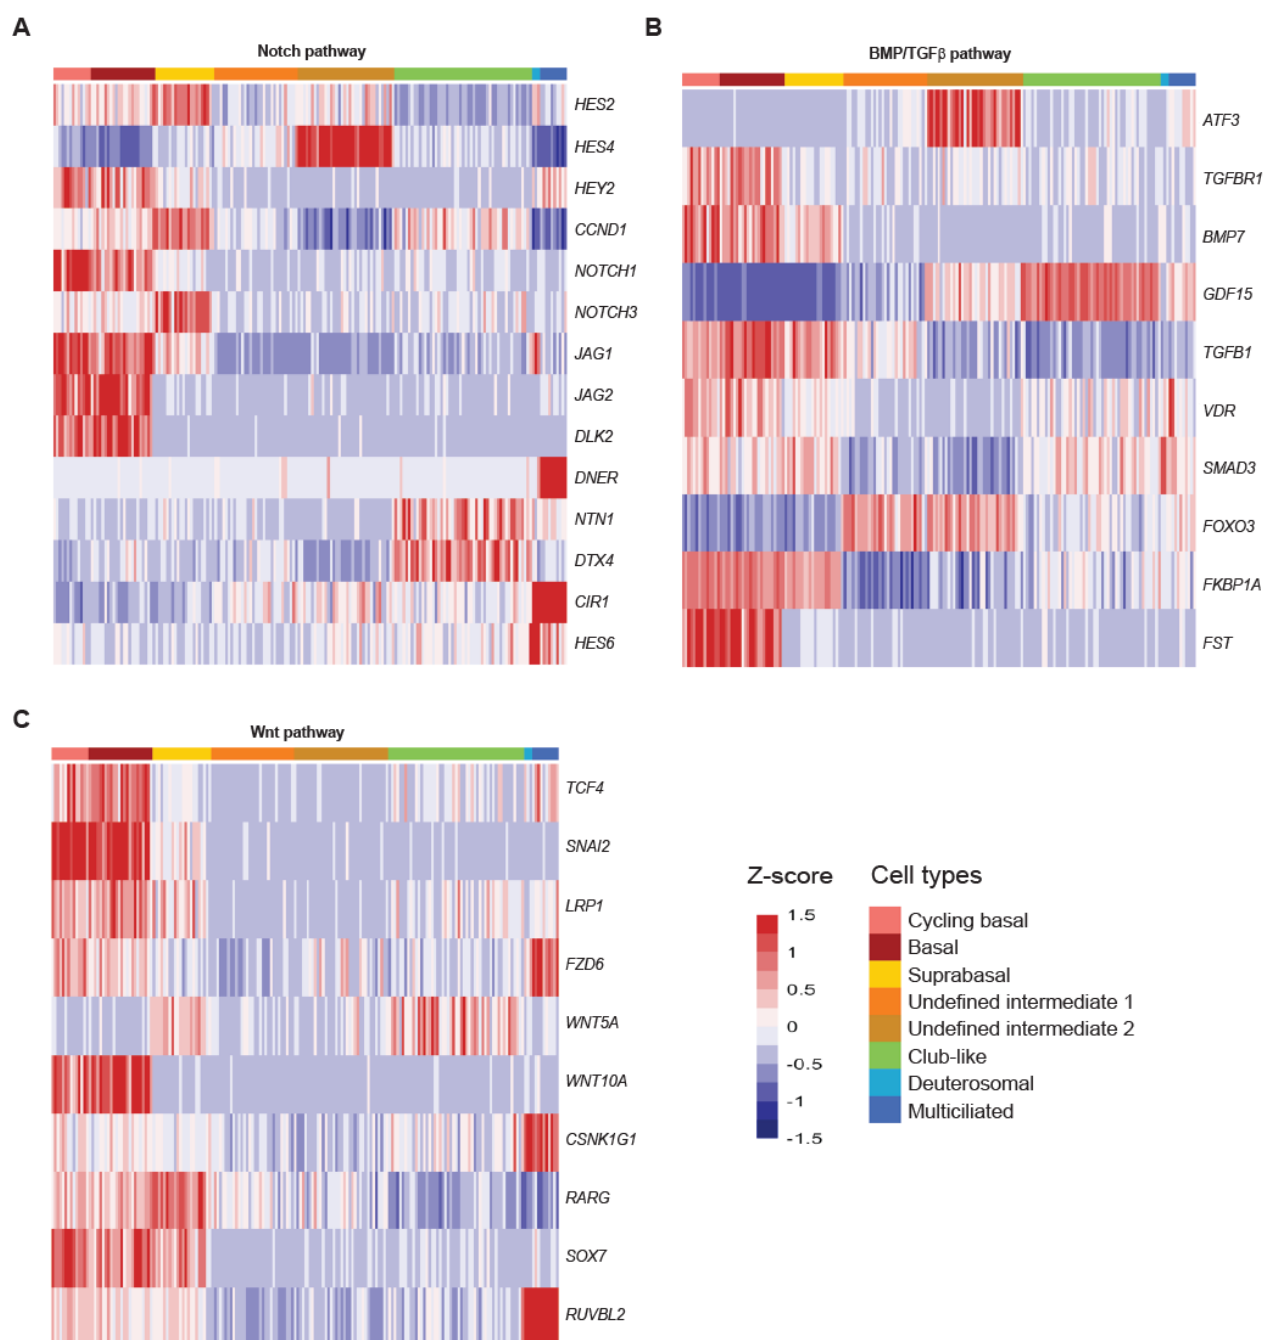

**Fig. S14. Expression of signaling pathways components of an ALI culture in BEGM medium**

(A) Heatmap of the genes related to the NOTCH pathway. (B) Heatmap of the genes related to the BMP/TGFβ pathway. (C) Heatmap of the genes related to the Wnt pathway. For all heatmaps, cells were ordered by cluster, obtained from the dataset of BEGM-differentiated cells (ALI 22).

**UCSC Cell browser links for data visualization:**

<http://caire.ipmc.cnrs.fr/cellbrowser/Differentiation/Pneumacult/>  
<http://caire.ipmc.cnrs.fr/cellbrowser/Differentiation/BEGM/>

**Table S1.** Robust cell type markers in the Pneumacult ALI28 sample

[Click here to Download Table S1](#)

**Table S2.** Robust cell type markers in the BEGM ALI22 sample

[Click here to Download Table S2](#)

**Table S3.** Differential Gene expression of club/goblet after branching vs. before branching and differential gene expression of End vs. Beginning of GC branch (2 tabs)

[Click here to Download Table S3](#)

**Table S4.** Detailed cell type markers in the Pneumacult ALI28 sample

[Click here to Download Table S4](#)

**Table S5.** Differential Gene expression of Deuterosomal vs. all other clusters, or of deuterosomal vs.

[Click here to Download Table S5](#)

**Table S6.** Summary of all the single-cell RNA-seq datasets of the study and comparison with quality metrics from other published airway single-cell datasets

[Click here to Download Table S6](#)



**Table S7: Primers used in the Biomark qRT-PCR**

| Gene    | Sequence of forward primer | Sequence of reverse primer |
|---------|----------------------------|----------------------------|
| AKAP14  | AGATTGTGGAAGAGGAGCGAAACCC  | TACCATGCTGGAGTGGTCGGC      |
| CCDC40  | CATCCCACGGAGTCTTAGGC       | TGGATCCTGTCAATCTGCCC       |
| CDC20B  | CGGCTGAGAAATATGCTTGG       | ATAAACACGCCCCAGTCTTG       |
| DNAI1   | AACGACGGCTGTCCCTAAAG       | AGCCTACAAAACGCTCCCTC       |
| FOXJ1   | TGGATCACGGACAACCTCTG       | GAGGCACTTTGATGAAGCAC       |
| IDAS    | TTTCAGAGACACGGTGGATG       | TGGTGATATGTCGCAAGGAG       |
| KRT5    | AGGAATGCAGACTCAGTGGAG      | CAGAGGAAACACTGCTTGTGAC     |
| MUC16   | GTCAAGCCAGGCAGCACAAGG      | GGGATGTGCCTGCTGGACTGC      |
| MUC5AC  | CCAAATACGCCAACAAGACC       | ATTCCATGGGTGTCAGCTTG       |
| MUC5B   | TGCAACCGTCCCGGCTTCG        | GTTGTGTTGCACACGCACACCG     |
| MYB     | ATGATGAAGACCCTGAGAAGGAAA   | AACAGGTGCACTGTCTCCATGA     |
| NEK10   | GCAAGAAATCACCATCAGGGAC     | GGCTGGAAGCTGTTGTTTGC       |
| PLK4    | TCCAACACAGGCACCAATC        | GAGATGTCTGTTCCAGAAGCTG     |
| RFX2    | GCGACCACATCCTCTACCAG       | AGTTACGGATGGCCTGTGTC       |
| RFX3    | AGCCAACATCATCAACAGTTTTT    | TGCAGTGACTTGATATCCTCAAA    |
| ROPN1L  | CTCGCATCCCCTTCAAGACG       | TCTTCCTGGCGTCTATATTTTCC    |
| SCGB1A1 | AGAGACGGGCCAGAGCATCCC      | GGCAGATCTCTGCAGAAGCGGAGC   |
| SPRR3   | TCTGCACAGCAGGTCCAGCATC     | AGGCTGGCTGGGTTGTTTCACC     |
| TFF3    | GGAGTACGTGGGCCTGTCTGC      | AGCCCCGGTTGTTGCACTCC       |

**Table S8: Heatmaps for clustering of each dataset**

[Click here to Download Table S8](#)
